# Supplementary material
Source: PubMed Central journal article supplement (PMC7299648)
Supplement: annrheumdis-2020-217871supp001.pdf [file annrheumdis-2020-217871supp001.pdf]

**Supplementary Table 1. Country origin of cases reported to the registry**

| <b>Country</b>         | <b>Frequency</b> | <b>Percent*</b> |
|------------------------|------------------|-----------------|
| Argentina              | n < 5            | < 1             |
| Australia              | 5                | 1               |
| Austria                | n < 5            | < 1             |
| Belgium                | n < 5            | < 1             |
| Bosnia and Herzegovina | n < 5            | < 1             |
| Brazil                 | 5                | 1               |
| Canada                 | 5                | 1               |
| Chile                  | 8                | 1               |
| Colombia               | n < 5            | < 1             |
| Croatia                | n < 5            | < 1             |
| Cyprus                 | n < 5            | < 1             |
| Czech Republic         | n < 5            | < 1             |
| Dominican Republic     | n < 5            | < 1             |
| England                | 85               | 14              |
| France                 | n < 5            | < 1             |
| Germany                | 6                | 1               |
| Greece                 | n < 5            | < 1             |
| Honduras               | n < 5            | < 1             |
| India                  | n < 5            | < 1             |
| Iran                   | 7                | 1               |
| Israel                 | n < 5            | < 1             |
| Italy                  | 6                | 1               |
| Kuwait                 | n < 5            | < 1             |
| Latvia                 | n < 5            | < 1             |
| Malaysia               | 5                | 1               |
| Mexico                 | n < 5            | < 1             |
| Netherlands            | 8                | 1               |
| Northern Ireland       | n < 5            | < 1             |
| Norway                 | n < 5            | < 1             |
| Pakistan               | n < 5            | < 1             |
| Philippines            | n < 5            | < 1             |
| Portugal               | n < 5            | < 1             |
| Republic of Ireland    | 13               | 2               |
| Saudi Arabia           | n < 5            | < 1             |
| Slovenia               | n < 5            | < 1             |
| South Africa           | n < 5            | < 1             |
| Spain                  | 59               | 10              |

---

|                                |       |     |
|--------------------------------|-------|-----|
| Switzerland                    | n < 5 | < 1 |
| Turkey                         | 15    | 3   |
| United States of America (USA) | 331   | 55  |

---

\*Percent may not equal 100 due to rounding

**Supplementary Table 2. Demographic and clinical characteristics of rheumatic disease patients with COVID-19 by diagnosis status**

|                               | Confirmed Diagnosis†<br>N = 548 | Presumptive Diagnosis<br>N = 52 |
|-------------------------------|---------------------------------|---------------------------------|
| Region                        |                                 |                                 |
| Region of the Americas: North | 321 (59)                        | 19 (37)                         |
| Region of the Americas: South | 16 (3)                          | 0 (0)                           |
| European Region               | 185 (34)                        | 33 (63)                         |
| African Region                | n < 5 (<1)                      | 0 (0)                           |
| Eastern Mediterranean Region  | 11 (2)                          | 0 (0)                           |
| South-East Asian Region       | n < 5 (<1)                      | 0 (0)                           |
| Western Pacific Region        | 13 (2)                          | 0 (0)                           |
| Female                        | 386 (70)                        | 37 (71)                         |
| Age                           |                                 |                                 |
| 18 - 29 years                 | 30 (5)                          | n < 5 (<10)                     |
| 30 - 49 years                 | 146 (27)                        | 23 (44)                         |
| 50 - 65 years                 | 208 (38)                        | 21 (40)                         |
| > 65 years                    | 164 (30)                        | 6 (12)                          |

|                                                     |                |                |
|-----------------------------------------------------|----------------|----------------|
| Median (IQR)                                        | 56 (46 – 67.5) | 50 (42 – 58.5) |
| Most Common Rheumatic Disease Diagnoses*            |                |                |
| Rheumatoid arthritis                                | 210 (38)       | 20 (38)        |
| Systemic lupus erythematosus                        | 80 (15)        | 5 (10)         |
| Psoriatic arthritis                                 | 66 (12)        | 8 (15)         |
| Axial spondyloarthritis or other spondyloarthritis  | 41 (7)         | 7 (13)         |
| Other                                               | 156 (28)       | 12 (23)        |
| Most Common Comorbidities                           |                |                |
| Hypertension                                        | 187 (34)       | 12 (23)        |
| Lung disease#                                       | 118 (22)       | 9 (17)         |
| Diabetes                                            | 68 (12)        | n < 5 (<10)    |
| Cardiovascular disease                              | 59 (11)        | 4 (8)          |
| Chronic renal insufficiency/End-stage renal disease | 40 (7)         | n < 5 (<10)    |
| Disease Activity (N=575)                            |                |                |
| Remission                                           | 160 (31)       | 13 (25)        |
| Minimal or low disease activity                     | 266 (51)       | 20 (38)        |

|                                               |          |             |
|-----------------------------------------------|----------|-------------|
| Moderate disease activity                     | 85 (16)  | 17 (33)     |
| Severe or high disease activity               | 12 (2)   | n < 5 (<10) |
| Ever Smoker (N=518)                           | 118 (22) | 11 (21)     |
| Medication Prior to COVID-19 Diagnosis^       |          |             |
| No DMARD                                      | 92 (17)  | 5 (10)      |
| csDMARD only, including anti-malarial therapy | 253 (46) | 19 (37)     |
| csDMARD only, excluding anti-malarial therapy | 203 (37) | 17 (33)     |
| Anti-malarial, with or without other DMARD    | 123 (22) | 7 (13)      |
| Anti-malarial Only                            | 50 (9)   | n < 5 (<10) |
| b/tsDMARDs Only                               | 95 (17)  | 12 (23)     |
| csDMARD + b/tsDMARD Combination Therapy       | 108 (20) | 16 (31)     |
| NSAIDs (N=531)                                | 101 (21) | 10 (22)     |
| Prednisone-Equivalent Glucocorticoids (N=592) |          |             |
| None                                          | 363 (67) | 40 (77)     |
| 1-9 mg/day                                    | 115 (21) | 10 (19)     |

|                                                                       |             |              |
|-----------------------------------------------------------------------|-------------|--------------|
| ≥ 10 mg/day                                                           | 62 (11)     | n < 5 (<10)  |
| Hospitalized                                                          | 273 (50)    | n < 5 (<10)  |
| Deceased                                                              | 54 (10)     | n < 5 (<10)  |
| Reported Days from Onset to Resolution or Death (N=275), median (IQR) | 12 (7 – 16) | 16 (10 – 20) |

N (column %) for categorical variables unless otherwise noted.

Percentages may not sum to 100 due to rounding.

NSAID = Nonsteroidal anti-inflammatory drugs, DMARD = disease-modifying anti-rheumatic drug;

†Confirmed diagnosis includes evidence of the patient having: a) a confirmatory COVID test; b) documentation of chest imaging showing bilateral infiltrates in keeping with COVID-19 pneumonia; or c) close contact with a known COVID-19 positive patient.

\*Cases could have more than one disease diagnosis. “Other” rheumatic disease category included (each n<10): undifferentiated connective tissue disease; ocular inflammation; autoinflammatory syndrome; mixed connective tissue disease; antiphospholipid antibody syndrome; calcium pyrophosphate deposition disease; systemic juvenile idiopathic arthritis; juvenile idiopathic arthritis, not systemic; IgG4-related disease.

#Chronic obstructive pulmonary disease, asthma, interstitial lung disease, or other not specified.

^Conventional synthetic DMARD (csDMARD) medications included: antimalarials (hydroxychloroquine, chloroquine), azathioprine, cyclophosphamide, cyclosporine, leflunomide, methotrexate, mycophenolate mofetil/mycophenolic acid, sulfasalazine, tacrolimus; Biologic or targeted synthetic DMARDs (b/tsDMARD) included: abatacept, belimumab, CD-20 inhibitors, IL-1 inhibitors, IL-6 inhibitors, IL-12/23 inhibitors, IL-17 inhibitors, anti-TNF, and Janus-kinase inhibitors

**Supplementary Table 3. Demographic and clinical characteristics of rheumatic disease patients with COVID-19 by sex**

|                               | Male<br>N=177 | Female<br>N=423 |
|-------------------------------|---------------|-----------------|
| Region                        |               |                 |
| Region of the Americas: North | 85 (48)       | 255 (60)        |
| Region of the Americas: South | 7 (4)         | 9 (2)           |
| European Region               | 77 (44)       | 140 (33)        |
| African Region                | n<5 (<1)      | n<5 (<1)        |
| Eastern Mediterranean Region  | 5 (3)         | 6 (1)           |
| South-East Asian Region       | n<5 (<1)      | n<5 (<1)        |
| Western Pacific Region        | n<5 (<1)      | 10 (2)          |
| Age                           |               |                 |
| 18 - 29 years                 | 10 (6)        | 22 (5)          |
| 30 - 49 years                 | 38 (21)       | 131 (31)        |
| 50 - 65 years                 | 56 (32)       | 173 (41)        |
| > 65 years                    | 73 (41)       | 97 (23)         |
| Median (IQR)                  | 61 (48 - 71)  | 54 (43 - 64)    |

|                                                     |         |          |
|-----------------------------------------------------|---------|----------|
| Most Common Rheumatic Disease Diagnoses*            |         |          |
| Rheumatoid arthritis                                | 53 (30) | 177 (42) |
| Systemic lupus erythematosus                        | 7 (4)   | 78 (18)  |
| Psoriatic arthritis                                 | 32 (18) | 42 (10)  |
| Axial spondyloarthritis or other spondyloarthritis  | 19 (11) | 20 (5)   |
| Vasculitis                                          | 16 (9)  | 28 (7)   |
| Other                                               | 51 (29) | 78 (18)  |
| Most Common Comorbidities                           |         |          |
| Hypertension                                        | 66 (37) | 133 (31) |
| Lung disease#                                       | 37 (21) | 90 (21)  |
| Diabetes                                            | 23 (13) | 46 (11)  |
| Cardiovascular disease                              | 34 (19) | 29 (7)   |
| Chronic renal Insufficiency/End stage renal disease | 19 (11) | 21 (5)   |
| Smoking Status (N=518)                              |         |          |
| Ever                                                | 98 (64) | 291 (80) |
| Never                                               | 55 (36) | 74 (20)  |
| Medication Prior to COVID-19 Diagnosis^             |         |          |



|                                                                         |             |             |
|-------------------------------------------------------------------------|-------------|-------------|
| No DMARD                                                                | 37 (21)     | 60 (14)     |
| csDMARD only, including anti-malarial therapy                           | 72 (41)     | 200 (47)    |
| csDMARD only, excluding anti-malarial therapy                           | 65 (37)     | 155 (37)    |
| Anti-malarial, with or without other DMARD                              | 23 (13)     | 107 (25)    |
| b/tsDMARDs only                                                         | 39 (22)     | 68 (16)     |
| csDMARD + b/tsDMARD combination therapy                                 | 29 (16)     | 95 (22)     |
| NSAIDs (N=531)                                                          | 32 (21)     | 79 (21)     |
| Prednisone-Equivalent Glucocorticoids (N=592)                           |             |             |
| None                                                                    | 127 (73)    | 276 (66)    |
| 1-9 mg                                                                  | 29 (17)     | 96 (23)     |
| ≥ 10 mg                                                                 | 19 (11)     | 45 (11)     |
| Hospitalized                                                            | 92 (52)     | 185 (44)    |
| Deceased                                                                | 15 (8)      | 40 (9)      |
| Reported Days from Onset to Resolution / Death<br>(N=275), median (IQR) | 12 (7 - 15) | 14 (8 - 17) |

N (column %) for categorical variables unless otherwise noted.

Percentages may not sum to 100 due to rounding.

NSAID = Nonsteroidal anti-inflammatory drugs, DMARD = disease-modifying anti-rheumatic drug;

\*Cases could have more than one disease diagnosis. Other rheumatic disease category included (each n<10): undifferentiated connective tissue disease; ocular inflammation; autoinflammatory syndrome; mixed connective tissue disease; anti-phospholipid antibody syndrome; calcium pyrophosphate deposition disease; systemic juvenile idiopathic arthritis; juvenile idiopathic arthritis, not systemic; IgG4-related disease.

#Chronic obstructive pulmonary disease, asthma, interstitial lung disease, or other not specified.

^Conventional synthetic DMARD (csDMARD) medications included: antimalarials (hydroxychloroquine, chloroquine), azathioprine, cyclophosphamide, cyclosporine, leflunomide, methotrexate, mycophenolate mofetil/mycophenolic acid, sulfasalazine, tacrolimus; Biologic or targeted synthetic DMARDs (b/tsDMARD) included: abatacept, belimumab, CD-20 inhibitors, IL-1 inhibitors, IL-6 inhibitors, IL-12/23 inhibitors, IL-17 inhibitors, anti-TNF, and janus-kinase inhibitors

**Supplementary Table 4. Individual counts of b/tsDMARDs in the non-TNF inhibitor b/tsDMARD group**

|           | <b>Biologic or small molecule therapy only (n=107)</b> | <b>Any biologic or small molecule therapy (n=231)</b> |
|-----------|--------------------------------------------------------|-------------------------------------------------------|
|           | <b>N (%)</b>                                           | <b>N (%)</b>                                          |
| Anti-TNF  | 56 (52)                                                | 119 (52)                                              |
| CD-20     | 10 (9)                                                 | 27 (12)                                               |
| IL-1      | 0 (0)                                                  | 2 (<1)                                                |
| IL-12/23  | 2 (2)                                                  | 3 (1)                                                 |
| IL-17     | 15 (14)                                                | 16 (7)                                                |
| IL-6      | 11 (10)                                                | 16 (7)                                                |
| JAKi      | 9 (8)                                                  | 26 (11)                                               |
| Abatacept | 3 (3)                                                  | 17 (7)                                                |
| Belimumab | 1 (1)                                                  | 10 (4)                                                |

IL – interleukin; JAKi – Janus kinase inhibitor

**Supplementary Table 5. Adjusted logistic regression model examining the association between demographic and clinical characteristics and COVID-19 hospitalization status, excluding presumptive cases (N=548)**

|                                                    | OR (95% CI)       | P-value |
|----------------------------------------------------|-------------------|---------|
| Female                                             | 0.80 (0.51, 1.25) | 0.32    |
| Age > 65 years                                     | 2.60 (1.61, 4.19) | <0.01   |
| Rheumatic Disease Diagnosis                        |                   |         |
| Rheumatoid arthritis                               | <i>Ref</i>        | --      |
| Systemic lupus erythematosus                       | 1.93 (1.03, 3.59) | 0.04    |
| Psoriatic Arthritis                                | 0.97 (0.49, 1.94) | 0.93    |
| Axial spondyloarthritis or other spondyloarthritis | 1.32 (0.58, 3.02) | 0.51    |
| Vasculitis                                         | 1.51 (0.64, 3.58) | 0.35    |
| Other                                              | 1.05 (0.60, 1.84) | 0.87    |
| Comorbidities (present vs. not)                    |                   |         |
| Hypertension or Cardiovascular Disease             | 1.86 (1.21, 2.86) | 0.01    |
| Lung Disease                                       | 2.51 (1.53, 4.13) | <0.01   |
| Diabetes                                           | 2.39 (1.26, 4.53) | 0.01    |
| Chronic renal Insufficiency/End stage renal        | 2.66 (1.06, 6.66) | 0.04    |

|                                                          |                   |      |
|----------------------------------------------------------|-------------------|------|
| disease                                                  |                   |      |
| Smoking status, ever (vs never)                          | 1.21 (0.92, 1.60) | 0.18 |
| Rheumatic Disease Medication Prior to COVID-19 Diagnosis |                   |      |
| No DMARD                                                 | <i>Ref</i>        | --   |
| csDMARD only                                             | 1.32 (0.73, 2.37) | 0.36 |
| b/tsDMARDs only                                          | 0.46 (0.22, 0.97) | 0.04 |
| csDMARD + b/tsDMARD combination therapy                  | 0.84 (0.41, 1.70) | 0.63 |
| NSAIDs                                                   | 0.68 (0.41, 1.14) | 0.15 |
| Prednisone-Equivalent Glucocorticoids                    |                   |      |
| None                                                     | <i>Ref</i>        | --   |
| 1-9 mg/day                                               | 1.02 (0.62, 1.68) | 0.94 |
| ≥ 10 mg/day                                              | 1.97 (0.99, 3.89) | 0.05 |

Odds ratios adjusted for all variables shown.

NSAID = Nonsteroidal anti-inflammatory drugs, DMARD = disease-modifying anti-rheumatic drug;

\*Patients with more than one disease within these five diagnoses were classified as follows: systemic lupus erythematosus > rheumatoid arthritis > psoriatic arthritis > vasculitis > axial/other spondyloarthritis > other. Other rheumatic disease category included (each n<10): undifferentiated connective tissue disease; ocular inflammation; autoinflammatory syndrome; mixed connective tissue disease; antiphospholipid antibody syndrome; calcium pyrophosphate

deposition disease; systemic juvenile idiopathic arthritis; juvenile idiopathic arthritis, not systemic; IgG4-related disease.

#Chronic obstructive pulmonary disease, asthma, interstitial lung disease, or other not specified.

^Conventional synthetic DMARD (csDMARD) medications included: antimalarials (hydroxychloroquine, chloroquine), azathioprine, cyclophosphamide, cyclosporine, leflunomide, methotrexate, mycophenolate mofetil/mycophenolic acid, sulfasalazine, tacrolimus; Biologic or targeted synthetic DMARDs (b/tsDMARD) included: abatacept, belimumab, CD-20 inhibitors, IL-1 inhibitors, IL-6 inhibitors, IL-12/23 inhibitors, IL-17 inhibitors, anti-TNF, and janus-kinase inhibitors

Patients with a “presumptive diagnosis” were excluded, meaning that their physician thought they had symptoms or signs consistent with the disease, but did not have a confirmatory test, chest x-ray, or close contact with a known positive patient.

**Supplementary Table 6. Adjusted logistic regression model examining the association between demographic and clinical characteristics and COVID-19 hospitalization status, excluding unresolved cases with reporting < 14 days from symptom onset or diagnosis date, or unknown resolution status (N=386)**

|                                                    | OR (95% CI)       | P-value |
|----------------------------------------------------|-------------------|---------|
| Female                                             | 0.83 (0.47, 1.44) | 0.51    |
| Age > 65 years                                     | 2.82 (1.54, 5.15) | <0.01   |
| Rheumatic Disease Diagnosis                        |                   |         |
| Rheumatoid Arthritis                               | <i>Ref</i>        | --      |
| Systemic Lupus Erythematosus                       | 1.61 (0.71, 3.65) | 0.25    |
| Psoriatic Arthritis                                | 0.87 (0.38, 1.99) | 0.73    |
| Axial spondyloarthritis or other spondyloarthritis | 1.07 (0.40, 2.82) | 0.89    |
| Vasculitis                                         | 0.82 (0.28, 2.38) | 0.72    |
| Other                                              | 0.75 (0.37, 1.53) | 0.43    |
| Comorbidities (present vs. not)                    |                   |         |
| Hypertension or Cardiovascular Disease             | 2.02 (1.16, 3.51) | 0.01    |
| Lung Disease                                       | 2.33 (1.24, 4.36) | 0.01    |
| Diabetes                                           | 2.06 (0.90, 4.71) | 0.09    |

|                                                          |                    |       |
|----------------------------------------------------------|--------------------|-------|
| Chronic Renal Insufficiency/ESRD                         | 5.32 (1.06, 26.78) | 0.04  |
| Smoking status, ever (vs never)                          | 1.32 (0.94, 1.85)  | 0.11  |
| Rheumatic Disease Medication Prior to COVID-19 Diagnosis |                    |       |
| No DMARD                                                 | <i>Ref</i>         | --    |
| csDMARD only                                             | 1.14 (0.56, 2.34)  | 0.72  |
| b/tsDMARDs only                                          | 0.26 (0.10, 0.66)  | <0.01 |
| csDMARD + b/tsDMARD combination therapy                  | 0.67 (0.28, 1.61)  | 0.37  |
| NSAIDs                                                   | 0.76 (0.41, 1.40)  | 0.38  |
| Prednisone-Equivalent Glucocorticoids                    |                    |       |
| None                                                     | <i>Ref</i>         | --    |
| 1-9 mg/day                                               | 0.69 (0.36, 1.29)  | 0.24  |
| ≥ 10 mg/day                                              | 4.31 (1.61, 11.56) | <0.01 |

Odds ratios adjusted for all variables shown.

NSAID = Nonsteroidal anti-inflammatory drugs, DMARD = disease-modifying anti-rheumatic drug;

\*Patients with more than one disease within these five diagnoses were classified as follows: systemic lupus erythematosus > rheumatoid arthritis > psoriatic arthritis > vasculitis > axial/other spondyloarthritis > other. Other rheumatic disease category included (each n<10): undifferentiated connective tissue disease; ocular inflammation; autoinflammatory syndrome; mixed connective tissue disease; antiphospholipid antibody syndrome; calcium pyrophosphate



deposition disease; systemic juvenile idiopathic arthritis; juvenile idiopathic arthritis, not systemic; IgG4-related disease.

#Chronic obstructive pulmonary disease, asthma, interstitial lung disease, or other not specified.

^Conventional synthetic DMARD (csDMARD) medications included: antimalarials (hydroxychloroquine, chloroquine), azathioprine, cyclophosphamide, cyclosporine, leflunomide, methotrexate, mycophenolate mofetil/mycophenolic acid, sulfasalazine, tacrolimus; Biologic or targeted synthetic DMARDs (b/tsDMARD) included: abatacept, belimumab, CD-20 inhibitors, IL-1 inhibitors, IL-6 inhibitors, IL-12/23 inhibitors, IL-17 inhibitors, anti-TNF, and janus-kinase inhibitors

Analysis included only resolved cases, and unresolved cases entered into the registry  $\geq$  14 days from symptom onset (or diagnosis date if symptom onset was not known), as it is unlikely that a patient would be hospitalized more than 2 weeks after onset.

**Supplementary Table 7. Complete case adjusted logistic regression model examining the association between demographic and clinical characteristics and COVID-19 hospitalization status (N=458)**

|                                                    | OR (95% CI)       | P-value |
|----------------------------------------------------|-------------------|---------|
| Female                                             | 0.90 (0.54, 1.48) | 0.68    |
| Age > 65 years                                     | 2.44 (1.43, 4.16) | <0.01   |
| Rheumatic Disease Diagnosis                        |                   |         |
| Rheumatoid Arthritis                               | <i>Ref</i>        | --      |
| Systemic Lupus Erythematosus                       | 1.63 (0.83, 3.22) | 0.16    |
| Psoriatic Arthritis                                | 0.78 (0.37, 1.65) | 0.52    |
| Axial spondyloarthritis or other spondyloarthritis | 0.99 (0.42, 2.35) | 0.99    |
| Vasculitis                                         | 1.38 (0.53, 3.55) | 0.51    |
| Other                                              | 0.94 (0.50, 1.75) | 0.84    |
| Comorbidities (present vs. not)                    |                   |         |
| Hypertension or Cardiovascular Disease             | 1.73 (1.08, 2.75) | 0.02    |
| Lung Disease                                       | 2.28 (1.33, 3.90) | <0.01   |
| Diabetes                                           | 3.12 (1.44, 6.79) | <0.01   |
| Chronic Renal Insufficiency/ESRD                   | 3.03 (1.00, 9.13) | 0.05    |

|                                                          |                   |      |
|----------------------------------------------------------|-------------------|------|
| Smoking status, ever (vs never)                          | 1.04 (0.61, 1.74) | 0.90 |
| Rheumatic Disease Medication Prior to COVID-19 Diagnosis |                   |      |
| No DMARD                                                 | <i>Ref</i>        | --   |
| csDMARD only                                             | 1.02 (0.54, 1.94) | 0.95 |
| b/tsDMARDs only                                          | 0.41 (0.19, 0.90) | 0.03 |
| csDMARD + b/tsDMARD combination therapy                  | 0.58 (0.27, 1.26) | 0.17 |
| NSAIDs                                                   | 0.66 (0.39, 1.12) | 0.12 |
| Prednisone-Equivalent Glucocorticoids                    |                   |      |
| None                                                     | <i>Ref</i>        | --   |
| 1-9 mg/day                                               | 1.15 (0.66, 2.00) | 0.62 |
| ≥ 10 mg/day                                              | 2.03 (0.99, 4.15) | 0.05 |

Odds ratios adjusted for all variables shown.

NSAID = Nonsteroidal anti-inflammatory drugs, DMARD = disease-modifying anti-rheumatic drug;

\*Patients with more than one disease within these five diagnoses were classified as follows: systemic lupus erythematosus > rheumatoid arthritis > psoriatic arthritis > vasculitis > axial/other spondyloarthritis > other. Other rheumatic disease category included (each n<10): undifferentiated connective tissue disease; ocular inflammation; autoinflammatory syndrome; mixed connective tissue disease; antiphospholipid antibody syndrome; calcium pyrophosphate

deposition disease; systemic juvenile idiopathic arthritis; juvenile idiopathic arthritis, not systemic; IgG4-related disease.

#Chronic obstructive pulmonary disease, asthma, interstitial lung disease, or other not specified.

^Conventional synthetic DMARD (csDMARD) medications included: antimalarials (hydroxychloroquine, chloroquine), azathioprine, cyclophosphamide, cyclosporine, leflunomide, methotrexate, mycophenolate mofetil/mycophenolic acid, sulfasalazine, tacrolimus; Biologic or targeted synthetic DMARDs (b/tsDMARD) included: abatacept, belimumab, CD-20 inhibitors, IL-1 inhibitors, IL-6 inhibitors, IL-12/23 inhibitors, IL-17 inhibitors, anti-TNF, and janus-kinase inhibitors
