# Supplementary material
Source: PubMed Central journal article supplement (PMC7299648)
Supplement: annrheumdis-2020-217871supp002.pdf [file annrheumdis-2020-217871supp002.pdf]

**Members of the COVID-19 Global Rheumatology Alliance**

**Arnav Agarwal**, Department of Medicine, University of Toronto, Canada  
**Amita Aggarwal**, Sanjay Gandhi Postgraduate Institute of Medical sciences, Lucknow, India  
**Akpabio A. Akpabio**, Medicine Department, University of Uyo Teaching Hospital, Uyo, Nigeria  
**Juan José Alegre-Sancho**, Hospital Universitario Dr Peset, Valencia, Spain  
**Ibrahim A. Almaghlouth**, King Saud University, Riyadh, Saudi Arabia  
**Deshire Alpizar-Rodriguez**, Mexican College of Rheumatology (Colegio Mexicano de Reumatología), Mexico  
**Isabelle Amigues**, National Jewish Health, Denver, Colorado, United States of America  
**Elizabeth Y. Ang**, National University Hospital, Singapore  
**Sheila T. Angeles-Han**, Cincinnati Children's Hospital Medical Center; University of Cincinnati, Ohio, United States of America  
**Saskya S. Angevare**, KAISZ, Netherlands  
**Rose Ardern**, Eastern Health, Newfoundland, Canada  
**Peer Aries**, Rheumatologie im Struenseehaus, Hamburg, Germany  
**Javier Bachiller**, Hospital Universitario Ramon y Cajal, Madrid, Spain  
**Wilson Bautista-Molano**, University Hospital Fundación Santa Fe de Bogotá, Colombia  
**Alison M. Bays**, University of Washington, Seattle, Washington, United States of America  
**Richard P. Beesley**, Juvenile Arthritis Research, United Kingdom  
**Francis Berenbaum**, Sorbonne Université, INSERM CRSA, AP-HP Saint-Antoine Hospital, Paris, France  
**Cemal Bes**, Bakırköy Dr. Sadi Konuk Research and Training Hospital, Istanbul, Turkey  
**Suleman Bhana**, Crystal Run Health, Middletown, New York, United States of America  
**Inita Bulina**, Pauls Stradins Clinical University hospital, Latvia  
**Antonio Cabral**, The Ottawa Hospital Research Institute, Ottawa, Ontario, Canada  
**Cassandra Calabrese**, Cleveland Clinic Foundation, Beachwood, Ohio, United States of America  
**Jose Campos**, Hospital Universitario Puerta de Hierro Majadahonda, Spain  
**Laura Cappelli**, Johns Hopkins University, Baltimore, Maryland, United States of America  
**Loreto Carmona**, Instituto de Salud Musculoesquelética, Madrid, Spain  
**Montserrat Corteguera Coro**, Complejo Asistencial de Ávila, Ávila, Spain  
**Yu Pei Eugenia Chock**, Yale School of Medicine, New Haven, Connecticut, United States of America  
**Ann Elaine Clarke**, University of Calgary, Calgary, Alberta, Canada  
**Richard Conway**, St. James's Hospital, Dublin, Ireland  
**Micaela A. Cosatti**, CEMIC, Argentina  
**Wendy Costello**, Irish Children's Arthritis Network (iCAN), Ireland  
**Coziana Ciurtin**, University College London, UK  
**Brahim Dahou**, Association Rhumatologues Algériens Privés (ARAP), Algeria

**Maria I. Danila**, University of Alabama at Birmingham, Birmingham, Alabama, United States of America  
**Natalia De la Torre-Rubio**, Hospital Universitario Puerta de Hierro Majadahonda, Madrid, Spain  
**Keshini Devakandan**, University Health Network, Canada  
**Ali Duarte-Garcia**, Mayo Clinic, Rochester, Minnesota, USA, United States of America  
**Maureen Dubreuil**, Boston University School of Medicine, Boston, Massachusetts, United States of America  
**Sasha Dunt**, Countess of Chester Hospital NHS Foundation Trust, Chester, UK  
**Karen LW. Durrant**, Autoinflammatory Alliance, San Francisco, California, United States of America  
**Gerard Espinosa**, Hospital Clinic de Barcelona, Barcelona, Spain  
**Antia Garcia-Fernandez**, Hospital Universitario Ramon y Cajal, Madrid, Spain  
**Christele Felix**, LupusChat, United States of America  
**Ruth Fernandez-Ruiz**, NYU Langone Health, New York, United States of America  
**Brittany A. Frankel**, University of Washington, Seattle, Washington, United States of America  
**Jourdan Frankovich**, Temple University Hospital, Philadelphia, Pennsylvania, United States of America  
**Daniel Xavier Xibillé Friedmann**, Hospital General de Cuernavaca, Cuernavaca, Morelos, México  
**Lucia Fusi**, King's College Hospital NHS Foundation Trust, London, UK  
**Milena A. Gianfrancesco**, University of California San Francisco, California, United States of America  
**Laure Gossec**, Sorbonne Université, Paris, France  
**Bethann Goulden**, University College London, United Kingdom  
**Elizabeth R. Graef**, Beth Israel Deaconess Medical Center, Boston, Massachusetts, United States of America  
**Jose A Gomez Puerta**, Hospital Clinic de Barcelona, Barcelona, Spain  
**Rebecca Grainger**, University of Otago, New Zealand  
**Anna Kristina Gutierrez**, Makati Medical Center/ Philippine Rheumatology Association, Philippines  
**Vedat Hamuryudan**, Istanbul University-Cerrahpasa, Cerrahpasa Medical School, Turkey  
**Carly O. Harrison**, LupusChat, United States of America  
**Jonathan S. Hausmann**, Boston Children's Hospital / Beth Israel Deaconess Medical Center, Harvard Medical School, Boston, Massachusetts, United States of America  
**Sebastian Herrera Uribe**, Hospital General de Medellín - ARTMEDICA, Colombia  
**Carol Hitchon**, University of Manitoba, Winnipeg, Manitoba, Canada  
**Bimba F. Hoyer**, Universitätsklinikum Schleswig-Holstein Kiel, Department for Rheumatology, Germany  
**Irvin J. Huang**, University of Washington, Seattle, Washington, United States of America  
**Kimme L. Hyrich**, University of Manchester, Manchester Academic Health Science Centre, Manchester, United Kingdom

**Sebastian Ibanez**, Facultad de Medicina Clínica Alemana–Universidad del Desarrollo Santiago, Chile and Padre Hurtado Hospital, San Ramón, Santiago, Chile  
**Bulina Inita**, Pauls Stradins Clinicak University Hospital, Latvia  
**Zara Izadi**, University of California San Francisco, California, United States of America  
**Lindsay R. Jacobsohn**, University of California San Francisco, California, United States of America  
**Arundathi Jayatilleke**, Temple University, Philadelphia, Pennsylvania, United States of America  
**Sindhu Johnson**, University Health Network, Canada  
**Julia Kay**, University of California San Francisco, California, United States of America  
**Patti Katz**, University of California San Francisco, California, United States of America  
**Arezou Khosroshahi**, Emory University, Atlanta, Georgia, United States of America  
**Mari Kihara**, Pharmaceuticals and Medical Devices Agency, Tokyo Medical and Dental University, Japan  
**Adam Killian**, George Washington University School of Medicine and Health Sciences, Washington, DC, United States of America  
**Alfred HJ. Kim**, Washington University School of Medicine, Saint Louis, Missouri, United States of America  
**Maximilian F. Konig**, The Johns Hopkins University School of Medicine, Baltimore, Maryland, United States of America  
**Peter Korsten**, Department of Nephrology and Rheumatology, University Medical Center Göttingen, Göttingen, Germany  
**Bharat Kumar**, University of Iowa, Iowa City, Iowa, United States of America  
**Diane LaCaille**, University of British Columbia, Canada  
**Lynn R. Laidlaw**, Versus Arthritis, United Kingdom  
**Maggie J. Larche**, McMaster University, Hamilton, Ontario, Canada  
**Jan Leipe**, Division of Rheumatology, Department of Medicine V, University Hospital, Mannheim, Germany  
**Laura B. Lewandowski**, National Institutes of Health, United States of America  
**Jing Li**, University of California San Francisco, California, United States of America  
**Mengtao Li**, Chinese SLE Treatment and Research Group (CSTAR), China  
**Jean W. Liew**, University of Washington, Seattle, Washington, United States of America  
**David FL. Liew**, Austin Health, Melbourne, Australia  
**Helen Linklater**, Epsom and St Helier University Hospitals NHS Trust, Epsom, UK  
**América Barrios López**, Colegio Mexicano de Reumatología, México  
**Pedro M. Machado**, University College London, London, United Kingdom  
**Kavita Makan**, University of the Witwatersrand, South Africa  
**Jessica Manson**, University College London, United Kingdom  
**Claudia Marques**, Universidade Federal de Pernambuco/Brazilian Society of Rheumatology, Brazil  
**Elsa F. Mateus**, EULAR Standing Committee of PARE (People with Arthritis/Rheumatism in Europe), Portugal  
**Kerry McKenna**, Jewish General Hospital, McGill University, Montreal, Quebec, Canada

**Serena AM. Mingolla**, Associazione Nazionale Persone con Malattie Reumatologiche e Rare, Italy

**Atusa Movasat**, Hospital Príncipe de Asturias, Alcalá de Henares, Madrid, Spain

**Linh Q. Ngo**, Hennepin Healthcare, Unites States of America

**Marc W. Nolan**, HealthPartners, St. Paul, Minnesota, United States of America

**Sheila O'Reilly**, Royal Derby Hospital, Derby, UK

**Anthony S. Padula**, Northern California Arthritis Center, United States of America

**Candace A. Palmerlee**, Patient Representative, United States of America

**Aarat M. Patel**, University of Virginia, United States of America

**Samir Patel**, Queen Elizabeth Hospital Woolwich/ Lewisham Hospital, London, UK

**Andrea Peirce**, Patient Representative, United States of America

**Tiffany M. Peterson**, LupusChat, United States of America

**Cecilia N. Pisoni**, CEMIC, Argentina

**Guillermo Pons-Estel**, Argentinean Society of Rheumatology / Grupo Latino Americano De Estudio del Lupus (GLADEL), Argenita

**Priyank Chaudhary**, Boice-Willis Clinic, Rocky Mount, NC, United States of America

**Laurie Proulx**, Canadian Arthritis Patient Alliance, Canada

**Michael S. Putman**, Northwestern University, Chicago, Illinois, United States of America

**Pankti Reid**, University of Chicago Medical Center, Illinois, United States of America

**Dawn P. Richards**, Canadian Arthritis Patient Alliance, Canada

**Krista Rideout**, Eastern Health, Newfoundland, Canada

**Philip C. Robinson**, University of Queensland Faculty of Medicine, Brisbane, Australia

**Tatiana Sofía Rodríguez-Reyna**, Instituto Nacional de Ciencias Médicas y Nutrición Salvador Zubirán, Mexico

**Jorge A. Rosario Vega**, Temple University Hospital, Philadelphia, Pennsylvania, United States of America

**Tamar B. Rubinstein**, Children's Hospital at Montefiore, Albert Einstein College of Medicine, New York, United States of America

**Eric M. Ruderman**, Feinberg School of Medicine, Northwestern University, Chicago, Illinois, United States of America.

**Stephanie Rush**, University of California San Francisco, California, United States of America

**Rosaria Salerno**, King's College Hospital NHS Foundation Trust, London, UK

**Maria José Santos**, Rheumatology Department, Hospital Garcia de Orta, Almada, Portugal

**Carlo Sciré**, Department of Medical Sciences, Rheumatology Unit, University of Ferrara, Cona (Ferrara), Italy

**Lotfi-Emran Sahar**, University of Minnesota, United States of America

**Catalina Sanchez-Alvarez**, Mayo Clinic, Rochester, Minnesota, United States of America

**Sebastian E. Sattui**, Hospital for Special Surgery/Weill Cornell Medicine, New York, United States of America

**Gabriela Schmajuk**, University of California San Francisco, California, United States of America

**Caroline Siegel**, Hospital for Special Surgery, New York, New York, United States of America

**Sonia D. Silinsky Krupnikova**, George Washington University School of Medicine and Health Sciences, Washington, DC, United States of America

**Julia F. Simard**, Stanford School of Medicine, California, United States of America

**Namrata Singh**, University of Washington, Seattle, Washington, United States of America

**Rashmi Sinha**, Systemic JIA Foundation, United States of America

**Rashmi R. Sinha**, Systemic JIA Foundation, United States of America

**Emily Sirotich**, Department of Health Research Methods, Evidence, and Impact, McMaster University, Hamilton, Ontario, Canada and Canadian Arthritis Patient Alliance, Toronto, ON, Canada

**Emily C. Somers**, University of Michigan, Ann Arbor, Michigan, United States of America

**Jeffrey A. Sparks**, Brigham and Women's Hospital, Harvard Medical School, Boston, MA, United States of America

**Christof Specker**, Evang. Kliniken Essen-Mitte, Germany

**Anja Strangfeld**, German Rheumatism Research Center (DRFZ Berlin), Epidemiology Unit, Berlin, Germany

**Paul Studenic**, Department of Internal Medicine 3, Medical University of Vienna, Austria

**Paul H. Sufka**, HealthPartners, St. Paul, Minnesota, United States of America

**Reema H. Syed**, Washington University, Saint Louis, Missouri, United States of America

**Herman Tam**, The Hospital for Sick Children (SickKids), Toronto, Ontario, Canada

**Dr. César Pacheco Tena**, Colegio Mexicano de Reumatología y Universidad Autónoma de Chihuahua, Chihuahua, México

**Carter Thorne**, University of Toronto, Canada

**Lisa S. Traboco**, Philippine Rheumatology Association, Philippines

**Erin M. Treemarcki**, University of Utah, United States of America

**Laura Trupin**, University of California, San Francisco, United States of America

**Edmund Tsui**, UCLA Stein Eye Institute, Los Angeles, California, United States of America

**Manuel F. Ugarte-Gil**, Universidad Científica del Sur and Hospital Nacional Guillermo Almenara Irigoyen, EsSalud. Lima, Peru

**Maricruz Elizabeth Ortegón Uicab**, Comité de Ética en Investigación de Medical Care and Research S.A de C.V., Mérida, Yucatán, México

**Sefi Uziel**, Pediatric Rheumatology Unit, Department of Pediatrics, Meir Medical Center, Kfar-Saba, Israel

**Claire Vandeveld**, Leeds Teaching Hospitals NHS Trust, UK

**Swamy R. Venuturupalli**, Cedars Sinai Medical Center, United States of America

**Mahdi Vojdanian**, Tehran University of Medical Sciences, Tehran, Iran

**Andrew Vreede**, University of Michigan, Ann Arbor, Michigan, United States of America

**Beth I. Wallace**, University of Michigan, United States of America

**Zachary S. Wallace**, Massachusetts General Hospital, Harvard Medical School, Boston, MA, United States of America

**Kate Webb**, University of Cape Town and Francis Crick Institute, South Africa  
**Tiffany Westrich-Robertson**, International Foundation for Autoimmune & Autoinflammatory Arthritis (AiArthritis), United States of America  
**Douglas W. White**, Gundersen Health System, La Crosse, Wisconsin, United States of America  
**Chris Wincup**, University College London, United Kingdom  
**Angus B. Worthing**, Arthritis & Rheumatism Associates, PC, United States of America  
**Katherine D. Wysham**, University of Washington, Seattle, Washington, United States of America  
**Jinoos Yazdany**, University of California San Francisco, California, United States of America  
**Su-Ann Yeoh**, University College London Hospital NHS Foundation Trust, London, UK  
**Kristen J. Young**, University of Texas Southwestern Medical Center, United States of America  
**Taryn Youngstein**, Imperial College, London, United Kingdom  
**Geraldine T. Zamora**, Philippine Rheumatology Association, Philippines  
**Erick A. Zamora**, Centro Médico Pensiones, Division de Autoinmunidad, México
